# Supplementary material for: First High-Resolution Crystal Structures of DNA:2′-O-Methyl-RNA Heteroduplexes
Source: MDPI journal article supplement (doi:10.3390/cryst12060760), 2022-05-25
Supplement: s1 [file s1]

## Supplementary information

### First crystal structures of DNA:2'-O-methyl-RNA heteroduplexes

Rafał M. Dolot <sup>1,\*</sup>, Anna Maciaszek <sup>1</sup>, Barbara Mikołajczyk <sup>1</sup>, and Barbara Nawrot <sup>1</sup>

<sup>1</sup> Centre of Molecular and Macromolecular Studies, Polish Academy of Sciences, Division of Bioorganic Chemistry, Sienkiewicza 112, 90-363 Łódź, Poland;

\* Correspondence: rdolot@cbmm.lodz.pl; Tel.: +48 42 6803325

**Table S1.** Backbone and glycosyl torsion angles.

| Residue                    | $\alpha$ (°) | $\beta$ (°) | $\gamma$ (°) | $\delta$ (°) | $\epsilon$ (°) | $\zeta$ (°) | $\chi$ (°) | $\varphi$ (°) | P (°) | Puckering |
|----------------------------|--------------|-------------|--------------|--------------|----------------|-------------|------------|---------------|-------|-----------|
| Overhanged DNA:2'-OMe-RNA  |              |             |              |              |                |             |            |               |       |           |
| Chain A (DNA)              |              |             |              |              |                |             |            |               |       |           |
| dT1                        | –            | –           | 50.8         | 81.5         | -148.6         | -69.5       | -158.6     | 41.7          | 14.5  | C3'-endo  |
| dC2                        | -62.7        | 171.3       | 55.1         | 81.9         | -154.4         | -74.3       | -164.5     | 40.3          | 18.7  | C3'-endo  |
| dT3                        | -67.0        | 179.0       | 48.6         | 82.1         | -147.9         | -69.1       | -156.4     | 40.9          | 16.8  | C3'-endo  |
| dC4                        | -70.3        | 169.0       | 55.4         | 77.8         | -150.2         | -72.2       | -161.1     | 45.3          | 16.1  | C3'-endo  |
| dC5                        | -61.1        | 172.0       | 54.9         | 79.5         | -156.3         | -78.4       | -165.5     | 43.2          | 17.6  | C3'-endo  |
| dT6                        | -60.7        | -179.4      | 44.0         | 79.2         | -144.6         | -69.7       | -159.1     | 43.9          | 14.9  | C3'-endo  |
| dA7                        | -68.8        | 164.4       | 62.1         | 78.7         | -155.1         | -73.3       | -168.9     | 43.8          | 18.4  | C3'-endo  |
| dG8                        | -60.2        | 171.8       | 57.3         | 84.8         | -150.9         | -72.4       | -160.0     | 37.4          | 15.7  | C3'-endo  |
| Chain B (2'-OMe-RNA)       |              |             |              |              |                |             |            |               |       |           |
| Am8                        | -57.3        | 177.1       | 52.9         | 81.4         | -142.5         | -72.8       | -161.0     | 42.0          | 13.9  | C3'-endo  |
| Gm7                        | -63.1        | 167.6       | 60.1         | 74.2         | -154.6         | -76.0       | -166.8     | 42.8          | 15.4  | C3'-endo  |
| Am6                        | -77.4        | -170.6      | 52.2         | 78.6         | -148.3         | -69.6       | -167.4     | 44.0          | 10.6  | C3'-endo  |
| Gm5                        | -63.6        | 178.2       | 56.7         | 81.0         | -152.9         | -68.1       | -172.2     | 38.5          | 10.1  | C3'-endo  |
| Gm4                        | 129.5        | -162.1      | -163.2       | 76.4         | -154.2         | -75.8       | -172.4     | 41.5          | 12.4  | C3'-endo  |
| Am3                        | -73.2        | -169.0      | 44.5         | 81.6         | -151.5         | -68.3       | -150.2     | 40.3          | 14.8  | C3'-endo  |
| Um2                        | -62.9        | 172.5       | 54.3         | 82.5         | -152.3         | -66.7       | -161.6     | 36.7          | 11.0  | C3'-endo  |
| Cm1                        | –            | –           | 60.6         | 79.3         | -145.0         | -76.8       | -164.5     | 38.6          | 14.5  | C3'-endo  |
| Blunt-ended DNA:2'-OMe-RNA |              |             |              |              |                |             |            |               |       |           |
| MOL1: Chain A (DNA)        |              |             |              |              |                |             |            |               |       |           |
| dG1                        | –            | –           | 51.0         | 89.6         | -149.2         | -74.0       | -169.8     | 36.2          | 4.4   | C3'-endo  |
| dT2                        | -69.8        | 173.3       | 52.1         | 82.7         | -146.9         | -70.7       | -160.7     | 41.9          | 14.9  | C3'-endo  |
| dC3                        | -66.2        | 159.9       | 63.8         | 79.7         | -166.3         | -68.4       | -166.3     | 42.5          | 18.8  | C3'-endo  |
| dT4                        | -72.1        | -177.4      | 55.8         | 84.5         | -154.9         | -70.7       | -158.3     | 39.8          | 18.0  | C3'-endo  |
| dC5                        | -59.1        | 172.4       | 46.3         | 82.5         | -160.4         | -65.5       | -156.7     | 40.0          | 16.1  | C3'-endo  |
| dC6                        | 139.5        | -173.2      | -170.1       | 88.4         | -154.4         | -72.9       | -171.0     | 38.6          | 5.9   | C3'-endo  |
| dT7                        | -62.9        | 178.5       | 53.1         | 90.7         | -159.3         | -73.3       | -158.6     | 32.2          | 22.7  | C3'-endo  |
| dA8                        | -64.7        | -173.3      | 57.7         | 146.0        | -172.8         | -99.0       | -116.9     | 38.6          | 163.4 | C2'-endo  |
| dG9                        | -58.0        | -176.1      | 35.4         | 141.0        | –              | –           | -108.6     | 40.6          | 153.5 | C2'-endo  |
| MOL1: Chain B (2'-OMe-RNA) |              |             |              |              |                |             |            |               |       |           |
| Cm9                        | -61.4        | 169.2       | 49.1         | 78.6         | –              | –           | -160.0     | 41.2          | 13.4  | C3'-endo  |
| Am8                        | -68.5        | 176.5       | 53.0         | 81.5         | -150.9         | -70.8       | -160.4     | 44.7          | 13.7  | C3'-endo  |
| Gm7                        | 142.3        | -165.4      | -171.4       | 85.8         | -147.4         | -82.4       | -175.0     | 35.7          | 8.7   | C3'-endo  |
| Am6                        | -51.2        | 168.0       | 53.4         | 79.4         | -157.6         | -66.8       | -163.7     | 42.4          | 12.0  | C3'-endo  |

|                            |       |        |        |      |        |       |        |      |       |          |
|----------------------------|-------|--------|--------|------|--------|-------|--------|------|-------|----------|
| Gm5                        | -59.4 | 176.9  | 47.8   | 77.8 | -149.7 | -77.0 | -168.2 | 43.0 | 12.1  | C3'-endo |
| Gm4                        | 149.2 | -166.2 | -176.3 | 82.5 | -143.2 | -78.1 | 180.0  | 38.2 | 10.1  | C3'-endo |
| Am3                        | -55.1 | 170.5  | 44.3   | 79.8 | -164.9 | -69.4 | -155.6 | 42.9 | 12.0  | C3'-endo |
| Um2                        | -62.5 | 172.2  | 50.2   | 80.4 | -142.4 | -73.4 | -162.9 | 39.9 | 13.3  | C3'-endo |
| Cm1                        | –     | –      | 61.4   | 78.4 | -150.8 | -73.3 | -167.1 | 41.4 | 12.0  | C3'-endo |
| MOL2: Chain C (DNA)        |       |        |        |      |        |       |        |      |       |          |
| dG1                        | –     | –      | 47.8   | 89.0 | -146.8 | -72.0 | -174.4 | 36.1 | 2.1   | C3'-endo |
| dT2                        | -61.9 | -179.2 | 43.6   | 86.1 | -165.2 | -76.5 | -154.8 | 37.7 | 14.1  | C3'-endo |
| dC3                        | 133.5 | -166.6 | -169.1 | 97.0 | -130.7 | -80.0 | -173.3 | 36.8 | 343.6 | C2'-exo  |
| dT4                        | -59.2 | 172.5  | 46.7   | 85.1 | -158.0 | -74.2 | -153.7 | 38.0 | 22.5  | C3'-endo |
| dC5                        | -63.3 | 168.9  | 49.3   | 81.8 | -151.4 | -73.2 | -152.4 | 41.1 | 17.1  | C3'-endo |
| dC6                        | -64.5 | 173.0  | 53.4   | 82.6 | -154.3 | -67.0 | -157.3 | 41.9 | 20.1  | C3'-endo |
| dT7                        | -73.9 | 177.0  | 56.4   | 81.1 | -151.4 | -71.6 | -157.0 | 43.1 | 15.6  | C3'-endo |
| dA8                        | -66.3 | -177.7 | 47.4   | 85.6 | -157.7 | -76.3 | -145.3 | 36.8 | 28.7  | C3'-endo |
| dG9                        | -72.5 | -165.3 | 41.0   | 92.0 | –      | –     | -119.0 | 32.1 | 6.6   | C3'-endo |
| MOL2: Chain D (2'-OMe-RNA) |       |        |        |      |        |       |        |      |       |          |
| Cm9                        | -65.2 | 175.2  | 51.9   | 77.1 | –      | –     | -156.8 | 39.5 | 15.1  | C3'-endo |
| Am8                        | -61.3 | 173.3  | 48.0   | 77.4 | -155.9 | -66.4 | -157.4 | 44.9 | 16.1  | C3'-endo |
| Gm7                        | 149.4 | -167.8 | -174.0 | 87.0 | -138.7 | -78.3 | -172.3 | 33.9 | 2.5   | C3'-endo |
| Am6                        | -61.5 | 171.7  | 52.9   | 80.2 | -164.6 | -70.8 | -161.3 | 43.2 | 18.0  | C3'-endo |
| Gm5                        | -64.0 | 171.4  | 57.0   | 78.1 | -148.3 | -76.0 | -166.7 | 40.8 | 16.6  | C3'-endo |
| Gm4                        | -69.2 | 168.4  | 53.5   | 78.3 | -147.7 | -72.8 | -168.5 | 41.8 | 15.5  | C3'-endo |
| Am3                        | 136.9 | -169.3 | -171.1 | 87.9 | -135.3 | -77.6 | -166.8 | 38.9 | 357.0 | C2'-exo  |
| Um2                        | -61.9 | 166.3  | 55.7   | 81.6 | -158.3 | -74.0 | -150.8 | 37.8 | 18.6  | C3'-endo |
| Cm1                        | –     | –      | 53.6   | 79.3 | -148.7 | -77.0 | -158.4 | 39.1 | 21.1  | C3'-endo |
| A-DNA                      | -50   | 172    | 42     | 79   | -146   | -79   | -154   |      |       |          |
| A-RNA                      | -68   | 178    | 54     | 82   | -153   | -71   | -158   |      |       |          |

**Table S2.** Dihedral angles C1'-C2'-O2'-CM2 calculated for all 2'-OMe-RNA residues.

| Residue | 7OW0    | 7OXS    |         |
|---------|---------|---------|---------|
|         | Chain B | Chain B | Chain D |
| Cm1     | 78.1    | 85.4    | 64.5    |
| Um2     | 83.0    | 72.1    | 83.1    |
| Am3     | 117.1   | 75.1    | 76.1    |
| Gm4     | 79.2    | 76.6    | 86.1    |
| Gm5     | 81.9    | 78.3    | 72.2    |
| Am6     | 78.2    | 147.2   | 62.5    |
| Gm7     | 72.4    | 71.6    | 76.1    |
| Am8     | 86.9    | 66.0    | 62.6    |
| Cm9     | 93.4    | 73.7    | 75.3    |

**Table S3.** Distances between water molecules and non-hydrogen nucleic acid atoms or Zn<sup>2+</sup> ions for overhanged DNA:2'-OMe-RNA duplex (PDB ID: 7OW0). The symmetry operation is not indicated, when both heavy atoms belong to the same asymmetric unit.

| A. Distances between non-hydrogen nucleic acid atoms and water molecules |                           |                 |                 |                        |                           |                 |                 |
|--------------------------------------------------------------------------|---------------------------|-----------------|-----------------|------------------------|---------------------------|-----------------|-----------------|
| Strand DNA (A)                                                           |                           |                 |                 | Strand 2'-OMe-RNA (B)  |                           |                 |                 |
| (Residue)<br>atom type                                                   | Symmetry<br>operation     | Water<br>number | Distance<br>(Å) | (Residue)<br>atom type | Symmetry<br>operation     | Water<br>number | Distance<br>(Å) |
| (dT1) O5'                                                                |                           | HOH209(A)       | 3.03            | (Cm1) N4               |                           | HOH229(B)       | 3.13            |
| (dT1) O4                                                                 |                           | HOH210(A)       | 2.67            | (Um2) OP1              | y, x, -z                  | HOH201(A)       | 2.48            |
| (dC2) OP1                                                                |                           | HOH208(A)       | 2.66            | (Um2) OP2              |                           | HOH215(B)       | 2.77            |
| (dC2) OP1                                                                |                           | HOH212(A)       | 2.72            | (Um2) O5'              |                           | HOH215(B)       | 3.20            |
| (dC2) OP2                                                                |                           | HOH209(A)       | 2.67            | (Um2) O2               |                           | HOH213(B)       | 2.74            |
| (dC2) O2                                                                 |                           | HOH206(A)       | 2.65            | (Am3) OP2              |                           | HOH207(B)       | 2.62            |
| (dC2) N4                                                                 |                           | HOH229(A)       | 2.98            | (Am3) O5'              |                           | HOH207(B)       | 2.78            |
| (dT3) OP2                                                                |                           | HOH211(A)       | 2.71            | (Am3) O3'              | y, x, -z                  | HOH213(B)       | 3.13            |
| (dT3) OP2                                                                |                           | HOH224(A)       | 3.04            | (Am3) O2'              | y, x, -z                  | HOH213(B)       | 3.07            |
| (dT3) O2                                                                 |                           | HOH223(A)       | 2.86            | (Am3) N3               |                           | HOH220(B)       | 2.90            |
| (dT3) O4                                                                 |                           | HOH221(A)       | 2.83            | (Am3) N7               |                           | HOH210(B)       | 2.68            |
| (dC4) OP1                                                                |                           | HOH213(A)       | 2.75            | (Gm4) OP2              |                           | HOH201(B)       | 2.33            |
| (dC4) OP1                                                                |                           | HOH218(A)       | 2.82            | (Gm4) OP2              |                           | HOH207(B)       | 2.70            |
| (dC4) OP2                                                                |                           | HOH219(A)       | 3.05            | (Gm4) N2               |                           | HOH224(B)       | 3.03            |
| (dC4) OP2                                                                |                           | HOH224(A)       | 2.88            | (Gm4) O6               |                           | HOH203(B)       | 2.54            |
| (dC4) N4                                                                 |                           | HOH228(A)       | 2.96            | (Gm4) N7               |                           | HOH210(B)       | 3.15            |
| (dC5) OP1                                                                |                           | HOH201(A)       | 2.32            | (Gm4) N7               |                           | HOH226(B)       | 3.12            |
| (dC5) OP1                                                                |                           | HOH215(A)       | 2.77            | (Gm5) OP1              | y, x, -z                  | HOH202(A)       | 2.71            |
| (dC5) OP2                                                                |                           | HOH219(A)       | 2.82            | (Gm5) OP2              |                           | HOH205(B)       | 2.89            |
| (dC5) OP2                                                                |                           | HOH231(A)       | 3.05            | (Gm5) OP2              |                           | HOH217(B)       | 2.83            |
| (dC5) O2                                                                 | x+1/2, -y+1/2, -<br>z+1/4 | HOH209(B)       | 2.99            | (Gm5) O6               |                           | HOH204(B)       | 2.58            |
| (dC5) N4                                                                 |                           | HOH234(A)       | 3.11            | (Gm5) N7               |                           | HOH205(B)       | 2.60            |
| (dT6) OP1                                                                |                           | HOH220(A)       | 2.83            | (Am6) OP1              |                           | HOH202(B)       | 2.49            |
| (dT6) OP2                                                                |                           | HOH216(A)       | 2.79            | (Am6) OP2              |                           | HOH218(B)       | 2.87            |
| (dT6) O3'                                                                |                           | HOH204(A)       | 2.74            | (Am6) N3               |                           | HOH228(B)       | 3.13            |
| (dT6) O4                                                                 |                           | HOH226(A)       | 2.90            | (Am6) N6               |                           | HOH233(B)       | 3.19            |
| (dA7) OP1                                                                |                           | HOH204(A)       | 2.55            | (Am6) N7               |                           | HOH206(B)       | 2.62            |
| (dA7) OP2                                                                |                           | HOH216(A)       | 3.06            | (Gm7) OP1              |                           | HOH211(B)       | 2.69            |
| (dA7) OP2                                                                |                           | HOH227(A)       | 2.95            | (Gm7) OP2              |                           | HOH202(B)       | 2.62            |
| (dA7) O3'                                                                |                           | HOH217(A)       | 3.19            | (Gm7) OP2              |                           | HOH214(B)       | 2.74            |
| (dA7) N7                                                                 |                           | HOH214(A)       | 2.75            | (Gm7) N2               |                           | HOH225(B)       | 3.11            |
| (dG8) OP1                                                                |                           | HOH217(A)       | 2.80            | (Gm7) O6               |                           | HOH219(B)       | 2.88            |
| (dG8) OP2                                                                |                           | HOH225(A)       | 2.88            | (Gm7) N7               |                           | HOH222(B)       | 2.93            |
| (dG8) OP2                                                                |                           | HOH233(A)       | 3.10            | (Am8) OP1              | x+1/2, -y+1/2, -<br>z+1/4 | HOH212(A)       | 2.76            |
| (dG8) N3                                                                 |                           | HOH222(A)       | 2.85            | (Am8) OP2              |                           | HOH216(B)       | 2.86            |
| (dG8) O6                                                                 |                           | HOH203(A)       | 2.51            | (Am8) OP2              |                           | HOH221(B)       | 2.91            |
| (dG8) O6                                                                 |                           | HOH205(A)       | 2.95            | (Am8) O2'              |                           | HOH223(B)       | 2.98            |
| (dG8) N7                                                                 |                           | HOH203(A)       | 3.04            | (Am8) N3               |                           | HOH231(B)       | 3.15            |
| (dG8) N7                                                                 |                           | HOH225(A)       | 3.02            | (Am8) N6               |                           | HOH232(B)       | 3.19            |
| (dG8) OP1                                                                |                           | HOH202(A)       | 2.48            | (Am8) N7               |                           | HOH216(B)       | 2.80            |
| (dG8) OP2                                                                |                           | HOH207(A)       | 2.65            | (Cm9) OP1              |                           | HOH208(B)       | 2.62            |
| (dG8) O4'                                                                |                           | HOH222(A)       | 2.85            | (Cm9) OP1              |                           | HOH227(B)       | 3.12            |
| (dG8) N2                                                                 |                           | HOH232(A)       | 3.10            | (Cm9) OP2              |                           | HOH221(B)       | 3.16            |
| (dG8) O6                                                                 |                           | HOH205(A)       | 2.60            | (Cm9) O2'              |                           | HOH209(B)       | 2.67            |

|                                                           |           |      |           |           |      |
|-----------------------------------------------------------|-----------|------|-----------|-----------|------|
| (dG8) N7                                                  | HOH230(A) | 3.04 | (Cm9) O2' | HOH212(B) | 2.92 |
|                                                           |           |      | (Cm9) N4  | HOH230(B) | 3.14 |
| <b>B. Distances between zinc ions and water molecules</b> |           |      |           |           |      |
| Zn101(A)                                                  | HOH203(A) | 2.25 | Zn101(B)  | HOH203(B) | 2.16 |
| Zn101(A)                                                  | HOH225(A) | 2.17 | Zn101(B)  | HOH210(B) | 2.16 |
| Zn101(A)                                                  | HOH230(A) | 2.10 | Zn101(B)  | HOH226(B) | 2.18 |
| Zn101(A)                                                  | HOH233(A) | 2.14 | Zn101(B)  | HOH234(B) | 2.23 |
| Zn101(A)                                                  | HOH244(A) | 2.14 | Zn101(B)  | HOH243(B) | 2.29 |
|                                                           |           |      | Zn102(B)  | HOH206(B) | 2.80 |
|                                                           |           |      | Zn102(B)  | HOH214(B) | 2.24 |
|                                                           |           |      | Zn102(B)  | HOH219(B) | 2.06 |
|                                                           |           |      | Zn102(B)  | HOH222(B) | 2.07 |
|                                                           |           |      | Zn102(B)  | HOH240(B) | 2.34 |

**Table S4.** Distances between water molecules and non-hydrogen nucleic acid atoms or  $\text{SO}_4^{2-}$  ions for blunt-ended DNA:2'-OMe-RNA duplex (PDB ID: 7OXS). The symmetry operation is not indicated, when both heavy atoms belong to the same asymmetric unit.

| A. Distances between non-hydrogen nucleic acid atoms and water molecules |                       |                 |                 |                        |                       |                 |                 |
|--------------------------------------------------------------------------|-----------------------|-----------------|-----------------|------------------------|-----------------------|-----------------|-----------------|
| Strand DNA (A)                                                           |                       |                 |                 | Strand 2'-OMe-RNA (B)  |                       |                 |                 |
| (Residue)<br>atom type                                                   | Symmetry<br>operation | Water<br>number | Distance<br>(Å) | (Residue)<br>atom type | Symmetry<br>operation | Water<br>number | Distance<br>(Å) |
| (dG1) O5'                                                                |                       | HOH203(A)       | 2.71            | (Cm1) O2'              |                       | HOH118(B)       | 2.96            |
| (dG1) O5'                                                                |                       | HOH215(A)       | 2.87            | (Cm1) O5'              |                       | HOH120(B)       | 3.02            |
| (dG1) O6                                                                 |                       | HOH204(A)       | 2.59            | (Um2) O4               |                       | HOH105(B)       | 2.78            |
| (dG1) N7                                                                 |                       | HOH209(A)       | 2.73            | (Am3) N3               |                       | HOH105(B)       | 2.93            |
| (dT2) OP2                                                                |                       | HOH203(A)       | 2.55            | (Am3) N6               |                       | HOH116(B)       | 3.13            |
| (dT2) OP2                                                                |                       | HOH210(A)       | 2.76            | (Gm4) N2               |                       | HOH122(B)       | 3.11            |
| (dT2) O5'                                                                |                       | HOH210(A)       | 3.08            | (Gm4) O6               |                       | HOH103(B)       | 3.16            |
| (dT2) O4                                                                 |                       | HOH211(A)       | 2.76            | (Gm4) O6               |                       | HOH106(B)       | 3.14            |
| (dC3) OP2                                                                |                       | HOH210(A)       | 2.99            | (Gm4) N7               |                       | HOH106(B)       | 2.78            |
| (dC3) N4                                                                 |                       | HOH220(A)       | 3.15            | (Gm5) N2               |                       | HOH124(B)       | 3.12            |
| (dT4) OP1                                                                |                       | HOH213(A)       | 2.83            | (Gm5) O6               |                       | HOH103(B)       | 2.71            |
| (dT4) OP2                                                                |                       | HOH216(A)       | 2.87            | (Gm5) N7               |                       | HOH114(B)       | 2.91            |
| (dT4) O4                                                                 |                       | HOH207(A)       | 2.69            | (Am6) OP1              |                       | HOH101(B)       | 2.47            |
| (dC6) OP1                                                                |                       | HOH219(A)       | 3.07            | (Am6) OP2              |                       | HOH104(B)       | 2.77            |
| (dC6) OP1                                                                | y, x, -z              | HOH105(D)       | 2.95            | (Am6) OP2              |                       | HOH119(B)       | 3.02            |
| (dC6) OP2                                                                |                       | HOH201(A)       | 2.29            | (Am6) N3               |                       | HOH111(B)       | 2.87            |
| (dC6) OP2                                                                |                       | HOH217(A)       | 2.97            | (Am6) N6               |                       | HOH115(B)       | 2.92            |
| (dC6) O2                                                                 |                       | HOH218(A)       | 3.02            | (Gm7) OP1              |                       | HOH109(B)       | 2.81            |
| (dT7) OP2                                                                |                       | HOH205(A)       | 2.51            | (Gm7) OP2              |                       | HOH102(B)       | 2.56            |
| (dT7) O4                                                                 |                       | HOH206(A)       | 2.64            | (Gm7) O6               |                       | HOH108(B)       | 2.81            |
| (dA8) N3                                                                 |                       | HOH214(A)       | 2.71            | (Gm7) O6               |                       | HOH125(B)       | 3.16            |
| (dA8) N7                                                                 |                       | HOH208(A)       | 2.86            | (Gm7) N7               |                       | HOH110(B)       | 2.82            |
| (dG9) OP2                                                                |                       | HOH212(A)       | 2.80            | (Am8) OP1              |                       | HOH107(B)       | 2.80            |
| (dG9) O6                                                                 |                       | HOH202(A)       | 2.45            | (Am8) OP2              |                       | HOH112(B)       | 2.88            |
|                                                                          |                       |                 |                 | (Am8) O2'              |                       | HOH113(B)       | 2.89            |
|                                                                          |                       |                 |                 | (Am8) N7               |                       | HOH117(B)       | 2.95            |
|                                                                          |                       |                 |                 | (Cm9) OP2              |                       | HOH107(B)       | 3.06            |
|                                                                          |                       |                 |                 | (Cm9) OP2              |                       | HOH112(B)       | 2.98            |
|                                                                          |                       |                 |                 | (Cm9) O3'              |                       | HOH123(B)       | 3.12            |

|                                                       |           |      | (Cm9) O3'              | -y, x-y, z+ $\frac{2}{3}$ | HOH118(B) | 3.17 |
|-------------------------------------------------------|-----------|------|------------------------|---------------------------|-----------|------|
|                                                       |           |      | (Cm9) N4               |                           | HOH121(B) | 3.05 |
| Strand DNA (C)                                        |           |      | Strand 2'-OMe-RNA (D)  |                           |           |      |
| (dG1) N3                                              | HOH206(C) | 2.90 | (Um2) O2'              |                           | HOH104(D) | 2.82 |
| (dG1) O6                                              | HOH201(C) | 2.53 | (Um2) O3'              |                           | HOH104(D) | 3.08 |
| (dT2) OP2                                             | HOH207(C) | 2.94 | (Um2) O4               |                           | HOH103(D) | 3.09 |
| (dT4) OP2                                             | HOH205(C) | 2.88 | (Am4) N6               |                           | HOH103(D) | 3.05 |
| (dC6) OP1                                             | HOH209(C) | 3.16 | (Am4) N7               |                           | HOH103(D) | 2.68 |
| (dT7) O4                                              | HOH202(C) | 2.71 | (Gm5) OP1              |                           | HOH105(D) | 2.91 |
| (dG9) O3'                                             | HOH204(C) | 2.85 | (Gm5) O2'              |                           | HOH106(D) | 2.96 |
| (dG9) O6                                              | HOH203(C) | 2.76 | (Gm5) N2               |                           | HOH108(D) | 3.05 |
| (dG9) N7                                              | HOH208(C) | 2.99 | (Am6) OP1              |                           | HOH107(D) | 3.01 |
|                                                       |           |      | (Gm7) O6               |                           | HOH102(D) | 2.64 |
|                                                       |           |      | (Am8) N7               |                           | HOH101(D) | 2.61 |
| B. Distances between sulfate ions and water molecules |           |      |                        |                           |           |      |
| SO <sub>4</sub> 101(A)                                | HOH216(A) | 3.04 | SO <sub>4</sub> 101(C) |                           | HOH205(C) | 2.88 |
| O2                                                    |           |      | O1                     |                           |           |      |
|                                                       |           |      | SO <sub>4</sub> 101(C) |                           | HOH103(D) | 2.90 |
|                                                       |           |      | O2                     |                           |           |      |
|                                                       |           |      | SO <sub>4</sub> 101(C) |                           | HOH202(C) | 2.78 |
|                                                       |           |      | O4                     |                           |           |      |
